# Supplementary material
Source: ML conference proceedings conference paper supplement (https://proceedings.mlr.press/v119/wang20d.html)
Supplement: Supplementary file 1 [file wang20d-supp.pdf]

## Supplementary Materials

### 1 Proof of Lemma 4.1

**Lemma 4.1.** The scaled soft-plus function  $\gamma_s(x) = s \log(1 + \exp(x/s))$  ( $s > 0$ ) is convex and  $\log(\gamma_s(x))$  is concave.

*Proof.* Since  $s$  is a positive constant, we only need to show that the soft-plus function  $\gamma(x) = \gamma_1(x)$  is convex and log concave. Then it is straightforward to show that the scaled version is also convex and log concave. To this end, we first observe that

$$\gamma(x) = \log(1 + \exp(x)) = -\log(\sigma(-x))$$

where  $\sigma(x) = 1/(1 + \exp(-x))$  is the sigmoid activation function. We then take the gradient of  $\gamma(x)$ ,

$$\frac{d\gamma(x)}{dx} = -\frac{1}{\sigma(-x)}\sigma(-x)(1 - \sigma(-x))(-1) = \sigma(x). \quad (1)$$

Note that we have used a known fact that  $\frac{d\sigma(x)}{dx} = \sigma(x)(1 - \sigma(x))$ . Next, we take the second derivative,

$$\frac{d^2\gamma(x)}{dx^2} = \sigma(x)(1 - \sigma(x)).$$

Since  $\forall x \in \mathbb{R}$ , we have  $0 \leq \sigma(x) \leq 1$ , we must have  $\frac{d^2\gamma(x)}{dx^2} \geq 0$ . Therefore,  $\gamma(x)$  is convex.

Now, let us look at  $h(x) = \log(\gamma(x))$ . First, we can derive the first derivative based on (1),

$$\frac{dh(x)}{dx} = \frac{1}{\gamma(x)} \frac{d\gamma(x)}{dx} = \frac{\sigma(x)}{\gamma(x)}.$$

Then, the second derivative is

$$\frac{d^2h(x)}{dx^2} = \frac{\frac{d\sigma(x)}{dx}\gamma(x) - \sigma(x)\frac{d\gamma(x)}{dx}}{(\gamma(x))^2} = \frac{\sigma(x) \cdot g(x)}{(\gamma(x))^2} \quad (2)$$

where

$$g(x) = (1 - \sigma(x))\gamma(x) - \sigma(x).$$

From (2), we can see that  $\sigma(x) \geq 0$  and  $(\gamma(x))^2 \geq 0$ . Therefore, we only need to check if  $g(x) \leq 0$  to show the concavity of  $h(\cdot)$ . Since  $\gamma(x) = -\log(\sigma(-x)) = -\log(1 - \sigma(x))$ , we can view  $g(x)$  as a function of  $t = 1 - \sigma(x)$ , namely,

$$g(x) = g(t) = -t \log(t) - (1 - t) = t(1 - \log(t)) - 1,$$

and  $0 \leq t \leq 1$ . Note that  $g(t) = 0$  when  $t = 1$ . We take the derivative of  $g(\cdot)$  w.r.t  $t$ ,

$$\frac{dg(t)}{dt} = 1 - \log(t) + t\left(-\frac{1}{t}\right) = -\log(t) \geq 0.$$

Therefore,  $g(t)$  is monotonically increasing with  $t$ . Since  $0 \leq t \leq 1$ , we always have  $g(t) \leq g(t = 1) = 0$ . Hence,  $\forall x, g(x) \leq 0$ . From (2), we have  $\frac{d^2h(x)}{dx^2} \leq 0$ , and hence the log soft-plus function is concave.  $\square$

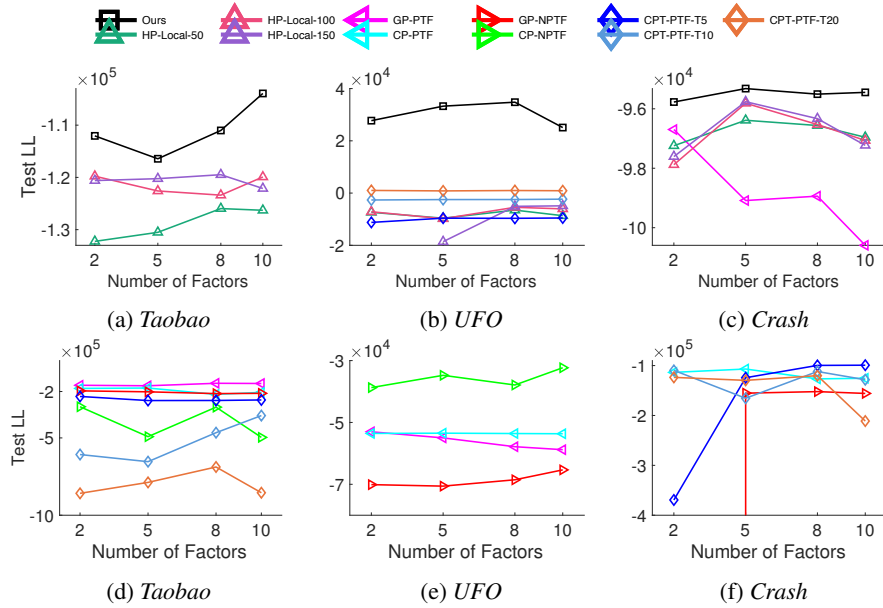

Figure 1: Test log-likelihood (LL) on real-world datasets. HP-Local-{50, 100, 150} means running HP-Local with window size 50, 100 and 150. CPT-PTF-{5,10,20} are CPT-PTF with 5, 10 and 20 time steps.

## 2 Complete Test Log-Likelihood Results

In Fig. 1, we report the test log-likelihood (LL) of all the methods in the three real-world datasets examined in Section 6.1 of the main paper. Note that the first row are the same as Fig. 1 in the main paper. The second row shows the prediction accuracy of the remaining methods, which are much worse than the results in the first row.
